# Supplementary material for: Production of phenolics via photocatalysis of ball milled lignin–TiO2 mixtures in aqueous suspension
Source: Royal Society of Chemistry journal article supplement (doi:10.1039/c5ra25954a), 2016-01-01
Supplement: c5ra25954a1.pdf [file c5ra25954a1.pdf]

## Supplementary Data

### Production of Phenolics via Photocatalysis of Ball Milled Lignin-TiO<sub>2</sub> Mixtures in Aqueous Suspension

Vaishakh Nair,<sup>a</sup> Piyali Dhar,<sup>a</sup> R. Vinu<sup>a,b,\*</sup>

<sup>a</sup> Department of Chemical Engineering, Indian Institute of Technology Madras, Chennai –  
600036, India

<sup>b</sup> National Center for Combustion Research and Development, Indian Institute of Technology  
Madras, Chennai – 600036, India

---

Table S1. SEM-EDS data of different wet milled TiO<sub>2</sub>-lignin mixtures.

| Sample | Carbon (%) | Oxygen (%) | Titanium (%) |
|--------|------------|------------|--------------|
| WMH    | 36.65      | 48.24      | 18.67        |
| WMA    | 37.25      | 48.99      | 13.61        |
| WMW    | 37.40      | 48.69      | 15.52        |

---

\* Corresponding Author. Phone: +91-44-2257 4187. E-mail: [vinu@iitm.ac.in](mailto:vinu@iitm.ac.in) (R. Vinu)

Figure S1. MALDI-TOF mass spectrum of lignin fully dissolved in NaOH at a pH of 12.

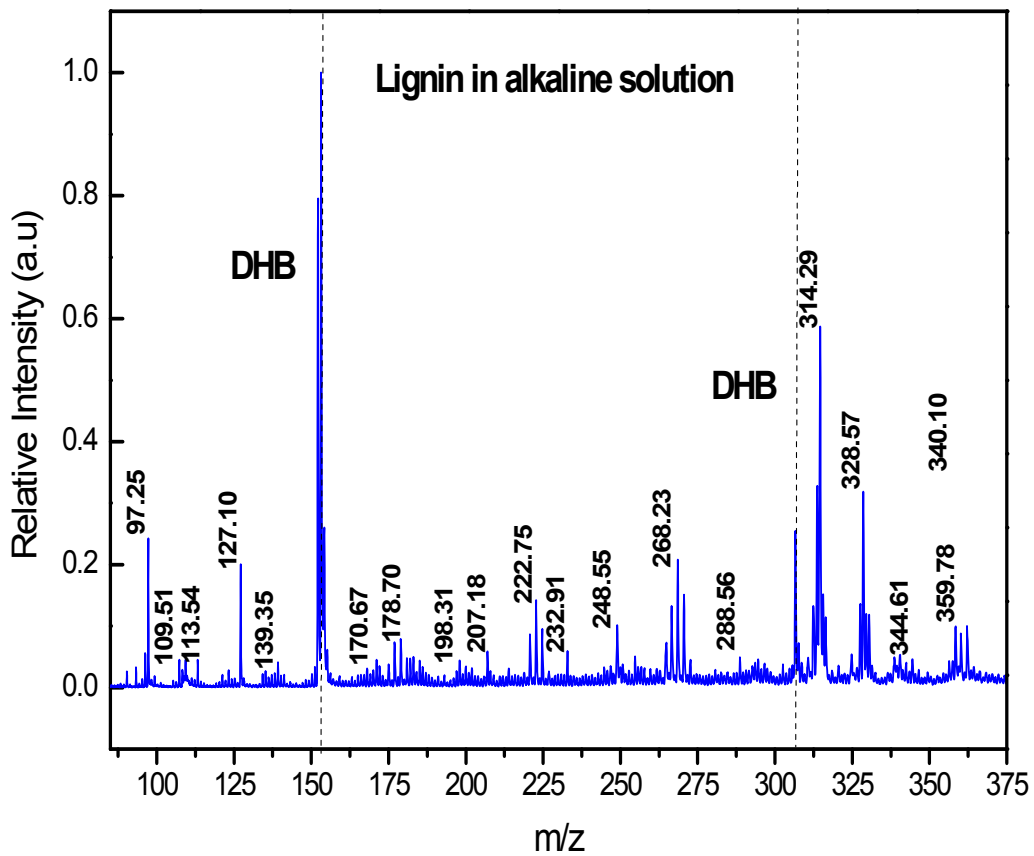

Figure S2. GPC calibration plot showing the variation of molecular weight of PMMA standards (M in Da) with elution volume (V in mL).

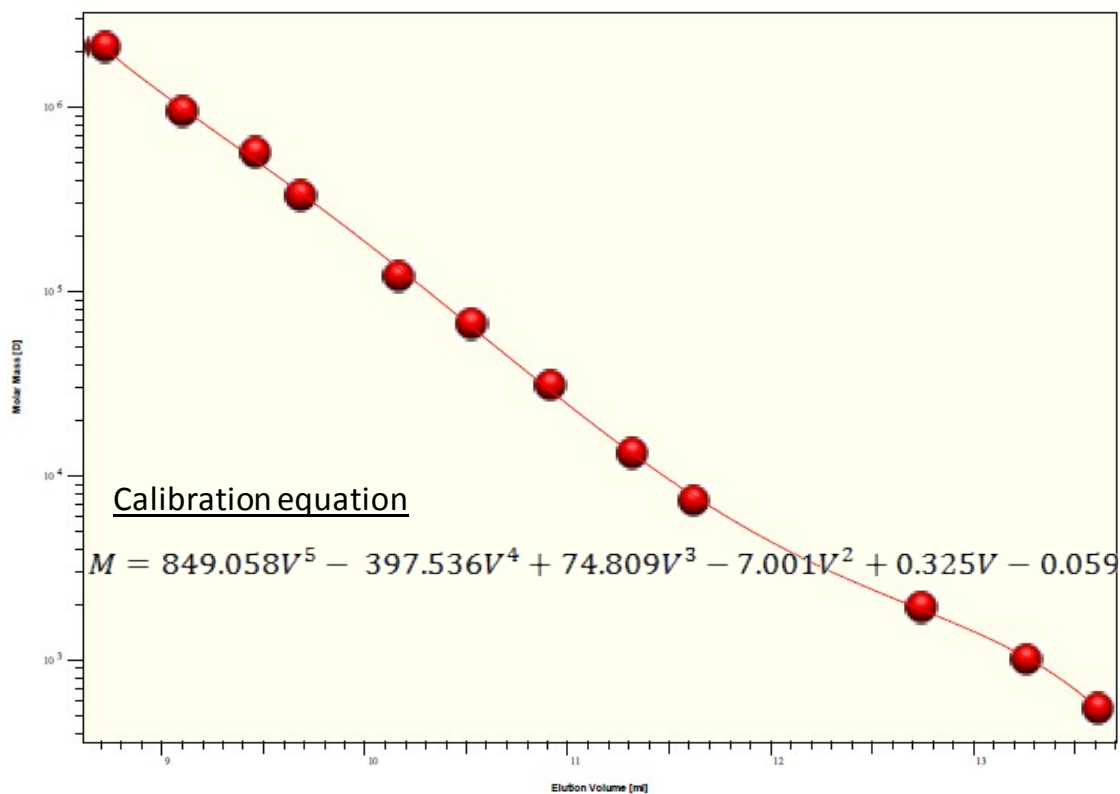

Figure S3. FT-IR spectra of lignin,  $\text{TiO}_2$  and various ball milled mixtures of lignin and  $\text{TiO}_2$  in the absence of presence of solvents. It is important to note that the  $\text{C}=\text{O}$  stretching vibration ( $1720\text{ cm}^{-1}$ ) is absent in the case of WMA and WMW mixtures. Similarly, phenolic O-H bending vibration ( $1364\text{ cm}^{-1}$ ) is also absent in both the mixtures. Other mixtures, DM and WMH, exhibit all the signature peaks of lignin.

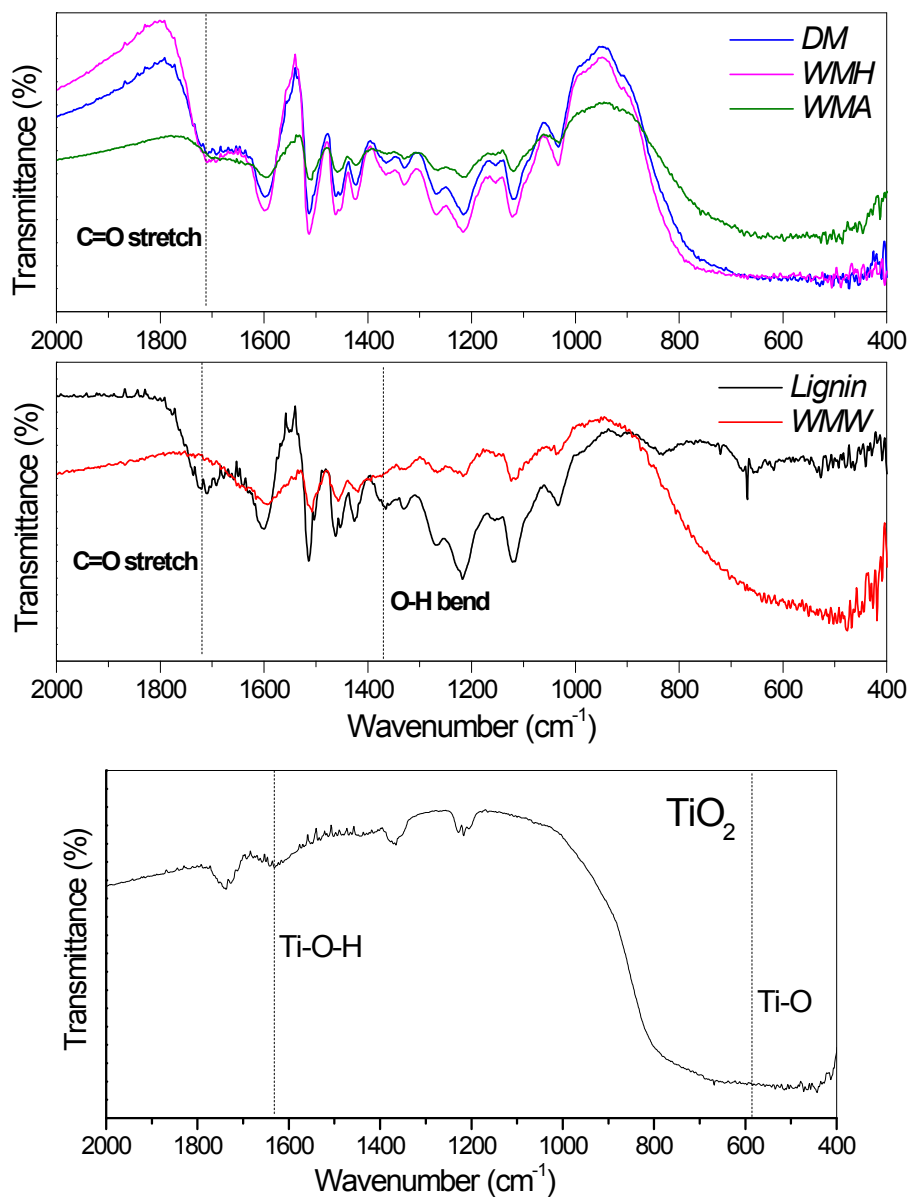

Figure S4. UV-visible spectra of Aeroxide® TiO<sub>2</sub> and various lignin-TiO<sub>2</sub> mixtures.

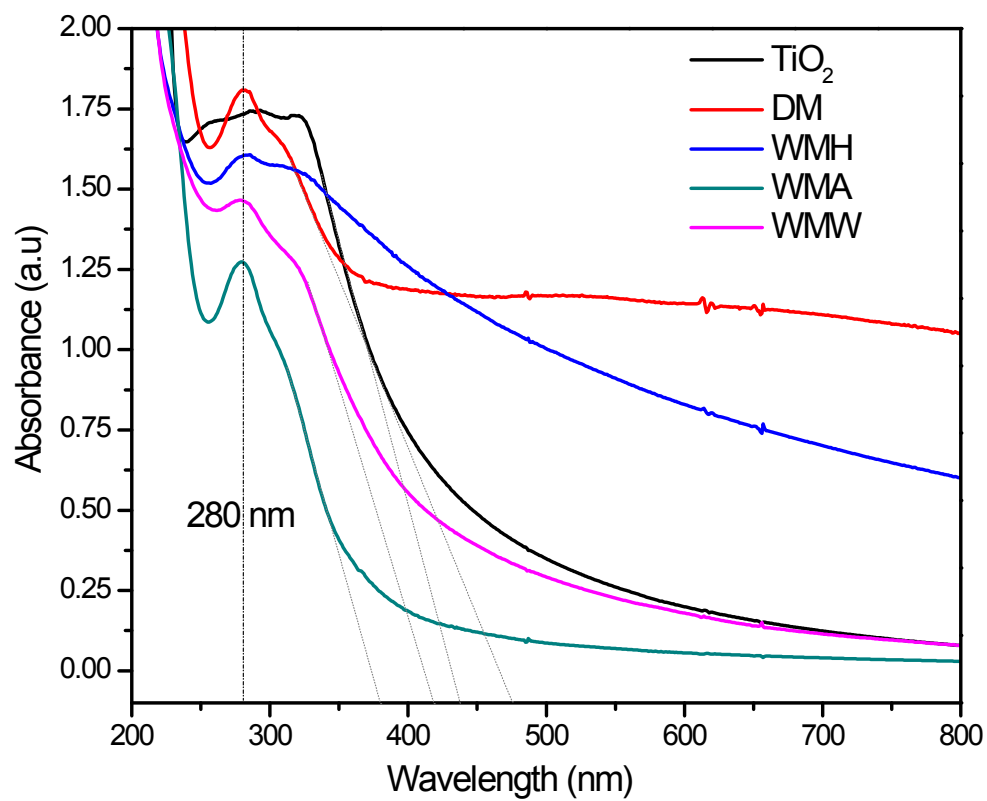

Figure S5. Particle size distribution of lignin and ball milled lignin

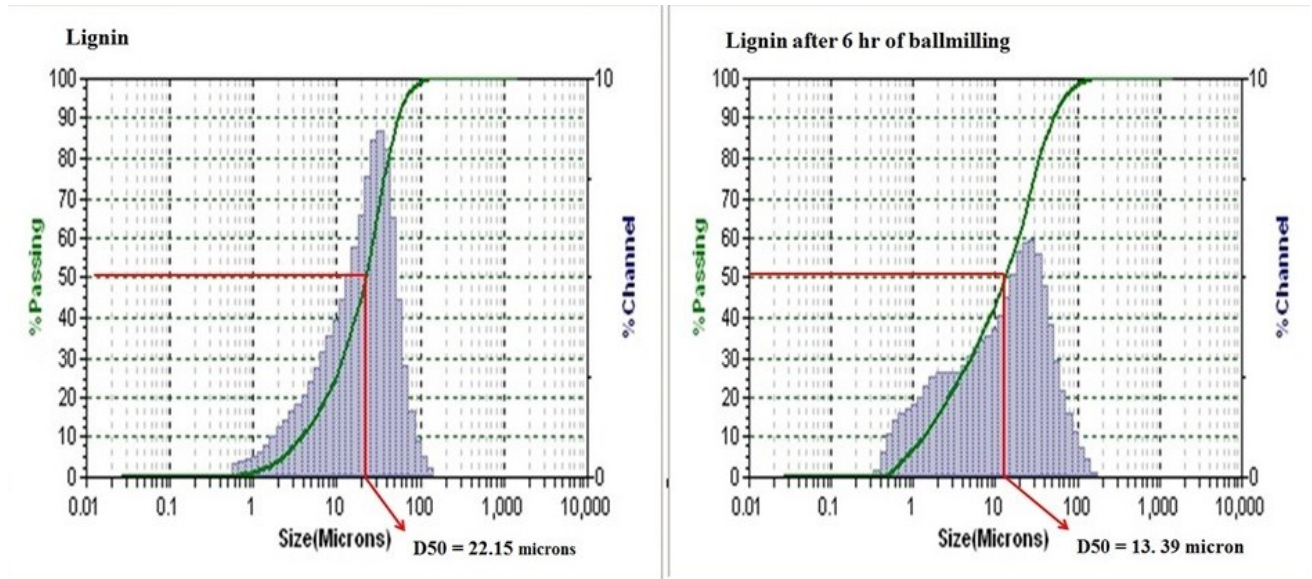

Figure S6. Molecular weight distribution of untreated lignin and after different treatments including wet milling with water, dark stirring and UV irradiation. The decrease in mass fraction of high molecular weight components of lignin with UV treatment is evident.

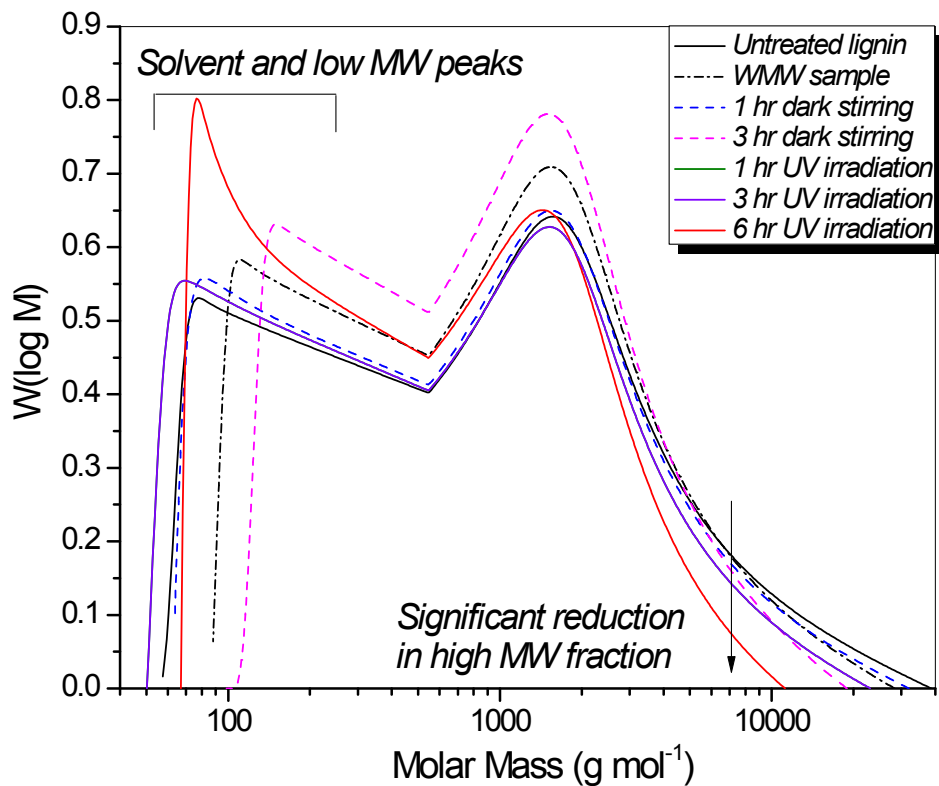

Figure S7. Concentration profiles of phenolic compounds formed during dark mixing and photocatalysis from different WMW lignin-TiO<sub>2</sub> mixtures containing different amounts of TiO<sub>2</sub>. The total concentration of the mixture in water was 2 g L<sup>-1</sup>.

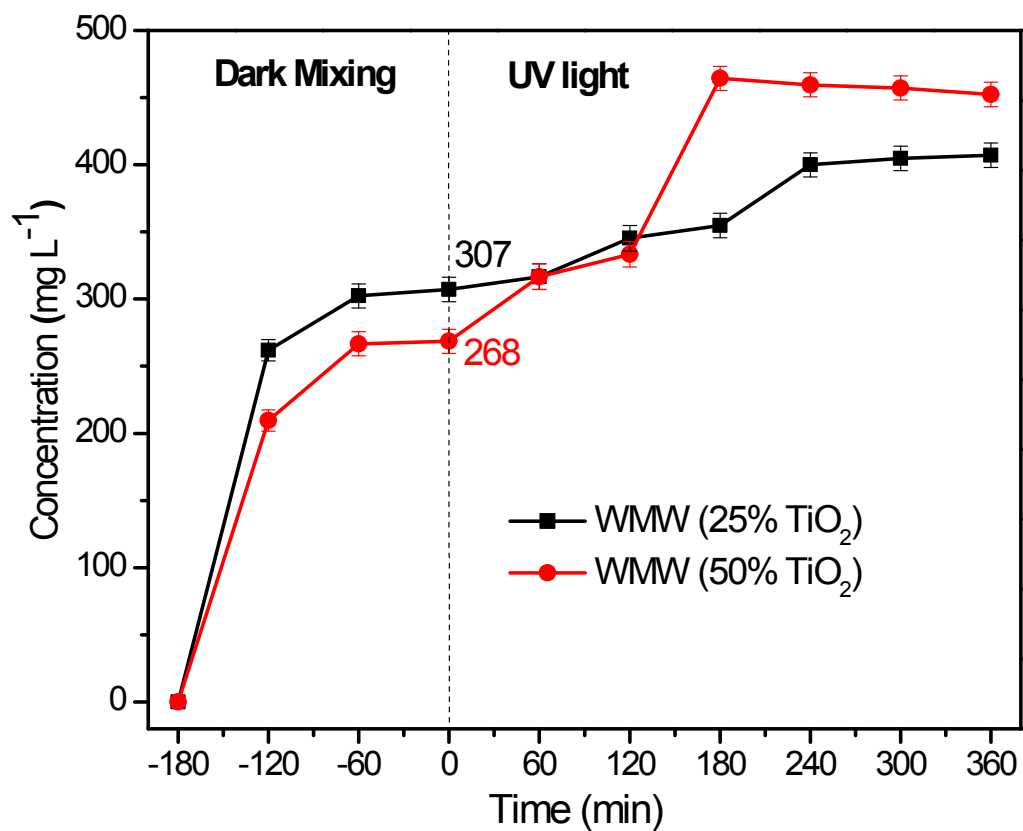



Table S2. List of products obtained when lignin was fast pyrolyzed at 500 °C in a micropyrolyzer (Frontier Laboratories, Japan) coupled with GC/MS. (G - guaiacol and its intermediates, H - simple phenol /hydroxy methyl and its intermediates, S - syringol and its intermediates)

| <b>Compound</b>                                            | <b>Area%</b> | <b>Phenol type</b> |
|------------------------------------------------------------|--------------|--------------------|
| 2-Methoxy-4-vinyl phenol (or) Vinyl guaiacol               | 13.09        | G                  |
| Phenol, 2-methoxy-4-methyl-                                | 6.91         | G                  |
| 2-Methoxyphenol                                            | 5.65         | G                  |
| Guaiacol, 4-ethyl-                                         | 4.47         | G                  |
| Isoeugenol                                                 | 3.43         | G                  |
| 1,2-Benzenediol, 3-methoxy-                                | 2.53         | G                  |
| Acetovanillone                                             | 1.22         | G                  |
| Isovanillin                                                | 0.77         | G                  |
| 4-Vinyl phenol                                             | 6.59         | H                  |
| Phenol, 4-ethyl-                                           | 1.74         | H                  |
| Phenol                                                     | 1.39         | H                  |
| Phenol, 4-methyl-                                          | 1.25         | H                  |
| Phenol, 2,6-dimethoxy- (or) Syringol                       | 5.94         | S                  |
| Phenol, 2,6-dimethoxy-4-(2-propenyl)- (or) Methoxy eugenol | 3.33         | S                  |
| Acetosyringone                                             | 9.11         | S                  |
| Syringaldehyde                                             | 0.7          | S                  |
| Carbon dioxide                                             | 15.25        |                    |
| n-Hexadecanoic acid                                        | 5.51         |                    |
| Squalene                                                   | 4.65         |                    |

|                    |            |  |
|--------------------|------------|--|
| Methanethiol       | 3.1        |  |
| 1-Nonadecene       | 1.8        |  |
| Tetradecanoic acid | 0.81       |  |
| 2-Propanone        | 0.76       |  |
| <b>TOTAL</b>       | <b>100</b> |  |

Analysis conditions: mass of lignin sample = 300±20 µg; pyrolysis temperature = 500 °C; flow rate of He gas = 1.59 mL min<sup>-1</sup>; GC column (UA-5; 30 m×0.25 mm; 0.25 µm film thickness); GC oven program - 40 °C for 1 min, heating at a rate of 10 °C min<sup>-1</sup> to 300 °C, and finally held at 300 °C for 15 min. Other conditions were similar as outlined in section 2.5.
